# Supplementary material for: Taste sensing and sugar detection mechanisms in Drosophila larval primary taste center
Source: eLife. 2021 Dec 3;10:e67844. doi: 10.7554/eLife.67844 (PMC8709573; doi:10.7554/eLife.67844)
Supplement: Figure 2—figure supplement 2—source data 1. — Recorded responses and p-values. [file elife-67844-fig2-figsupp2-data1.xlsx]

## Sheet: Sheet1
	date	prep_name	order	substance	resp_DF/F0
2	20211007	prep1	before	Sucr500	0.285387
3	20211020	prep3	before	Sucr500	0.278045
4	20211020	prep4	before	Sucr500	0.202783
5	20211020	prep5	before	Sucr500	0.67644
6	20211007	prep1	after	Sucr500	0.187664
7	20211007	prep2	after	Sucr500	0.377219
8	20211020	prep3	after	Sucr500	0.347129
9	20211020	prep5	after	Sucr500	0.248623
						One-way ANOVA (Tukey HSD)
						treatments	Tukey HSD	Tukey HSD	Tukey HSD
						pair	Q statistic	p-value	inferfence
						A vs B	0.863	0.573202	insignificant
