# Supplementary material for: Taste sensing and sugar detection mechanisms in Drosophila larval primary taste center
Source: eLife journal article supplement (doi:10.7554/elife.67844), 2021-12-03
Supplement: supp [file elife-67844-supp-v1.zip]

Archive with 15 entries (15 files):
- elife_poa_e67844_Figure_1_figure_supplement_1.pdf
- elife_poa_e67844_Figure_2_figure_supplement_1.pdf
- elife_poa_e67844_Figure_2_figure_supplement_2.pdf
- elife_poa_e67844_Figure_4_figure_supplement_1.pdf
- elife_poa_e67844_Figure_4_figure_supplement_2.pdf
- elife_poa_e67844_Transparent_Reporting_File.docx
- elife_poa_e67844_Figure_1_source_data_1.zip
- elife_poa_e67844_Figure_1_figure_supplement_1_source_data_1.zip
- elife_poa_e67844_Figure_2_source_data_1.xlsx
- elife_poa_e67844_Figure_2_source_data_2.xlsx
- elife_poa_e67844_Figure_3_source_data_1.xlsx
- elife_poa_e67844_Figure_4_source_data_1.xlsx
- elife_poa_e67844_Figure_4_figure_supplement_1_source_data_1.xlsx
- elife_poa_e67844_Figure_4_figure_supplement_2_source_data_1.xlsx
- elife_poa_e67844_Figure_1_video_1.mov
