# Supplementary material for: Taste sensing and sugar detection mechanisms in Drosophila larval primary taste center
Source: eLife journal article supplement (doi:10.7554/elife.67844), 2021-12-03

**Figure 2 - Supplement 1: Whole-organ calcium imaging - an overview of response tuning of GRNs per recorded organ.**

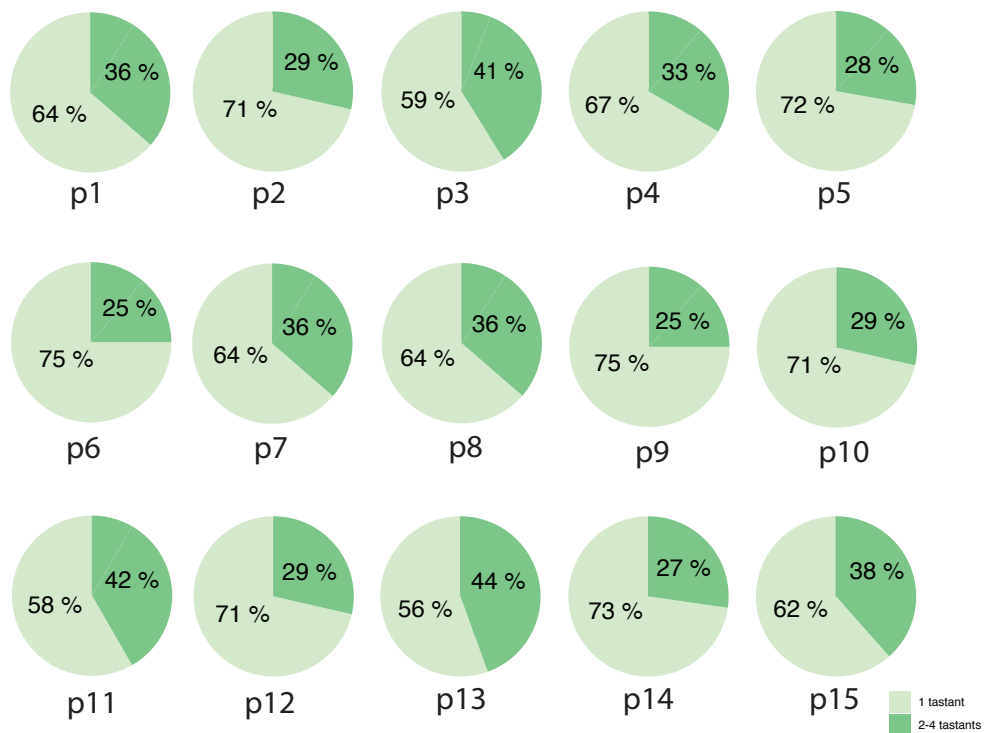

Supplement: supp [file elife-67844-supp-v1.zip › elife_poa_e67844_Figure_2_figure_supplement_1.pdf]
