# Supplementary material for: Taste sensing and sugar detection mechanisms in Drosophila larval primary taste center
Source: eLife journal article supplement (doi:10.7554/elife.67844), 2021-12-03
Supplement: supp [file elife-67844-supp-v1.zip › elife_poa_e67844_Figure_2_source_data_1.xlsx]

## Sheet: Fig2 B & C-summary
Summary Fig.2 - number of neurons and responses considered for analysis
stimulation with groups of tastants - Fig2B & C	count	percentage (out of total neurons considered per category - thick box border)
sugar, amino acid and salt groups
no. of recorded organs	8
total neurons considered	105
total responses considered	228
neurons resp to 1 modality	63	0.6
no. neurons resp to 2 mod	24	0.2285
no. neurons resp to 3 mod	12	0.1142
no. neurons resp to 4 mod	6	0.0571
no. neurons resp to 1 group	55	0.5238
no. neurons resp to 2 gr	23	0.219
no. neurons resp to 3 gr	7	0.0666
no. neurons resp to 4 gr	8	0.0761
no. neurons resp to more than 5 gr	12	0.1142
sugar groups: mono- and disaccharides
no. of recorded organs	14
total considered neurons resp to sugar groups	63
total considered responses to sugar groups	79
no. neurons resp to monosac.	26	0.4126
no. neurons resp to disac.	21	0.3333
no. neurons resp to both sugar groups	16	0.2539
salt groups: low and high concentration
no. of recorded organs	6
total considered neurons resp to salt	45
total considered responses to salt	54
no. neurons resp to low salt	11	0.2444
no. neurons resp to high salt	25	0.5555
no. neurons resp to both salt groups	9	0.2
amino acid groups: A, B, C, D
no. of recorded organs	7
total considered neurons resp to amino acid groups	73
total considered responses to amino acid groups	121
no. neurons resp to 1 amino acid group	45	0.6164
no. neurons resp to 2 amino acid group	13	0.178
no. neurons resp to 3 amino acid group	11	0.1506
no. neurons resp to 4 amino acid group	4	0.0547
bitter groups: DSoTC and QLSC
no. of recorded organs	6
total considered neurons resp to bitter groups	20
total considered responses to bitter groups	23
no. neurons resp to QLSC.	6	0.3
no. neurons resp to DSoTC.	11	0.55
no. neurons resp to both bitter groups	3	0.15
sugar vs bitter groups: 2 gr sugar, 2 gr bitter
no. of recorded organs	6
total considered neurons resp in animals stimulated with both modalities	33
total considered responses in animals stimulated with both modalities	52
no. neurons resp to only to bitter groups	10	0.303
no. neurons resp to only to sugar groups	13	0.3939
no. neurons resp to both modalities	10	0.303

## Sheet: Fig2B-groups_sugar_aa_salts
Responsive neurons from organs stimulated with sugar, amino acid and salt groups - Fig.2B
Taste group	DF/F0 %	cell_name_in_prep	modality
aaA	196.146	1_PM1	amino_acids
aaA	122.428	1_AC1	amino_acids
aaA	121.029	1_ACM	amino_acids
aaA	446.271	1_ACM2	amino_acids
aaA	31.87	2_ADL	amino_acids
aaA	187.742	2_CP2	amino_acids
aaA	69.7404	2_PM1	amino_acids
aaA	100.719	2_AC2	amino_acids
aaA	169.061	2_CAC2	amino_acids
aaA	45.2882	10_CCP	amino_acids
aaA	160.172	10_CP1	amino_acids
aaA	64.6384	10_ACM1	amino_acids
aaA	412.195	10_CAC2	amino_acids
aaA	60.2199	11_AC1	amino_acids
aaA	23.8958	11_CL1	amino_acids
aaA	98.5354	11_CM2	amino_acids
aaA	164.862	11_ACL2	amino_acids
aaA	117.707	11_PL2	amino_acids
aaA	44.13	14_PM1	amino_acids
aaA	295.674	14_CM2	amino_acids
aaA	43.5263	14_CVL	amino_acids
aaA	135.194	14_CAC2	amino_acids
aaA	157.375	14_PL2	amino_acids
aaA	1143.06	14_CMV	amino_acids
aaA	27.3971	15_ADL	amino_acids
aaA	38.0683	15_CAC	amino_acids
aaA	301.455	15_CM2	amino_acids
aaA	199.436	15_CMV	amino_acids
aaA	107.627	15_CVL	amino_acids
aaA	34.8387	16_ADL	amino_acids
aaA	390.987	16_CM1	amino_acids
aaA	68.5761	16_CP2	amino_acids
aaA	198.655	16_ACC2	amino_acids
aaA	530.668	16_CM2	amino_acids
aaB	127.296	1_PM1	amino_acids
aaB	66.6381	2_ADL	amino_acids
aaB	138.84	2_CP2	amino_acids
aaB	49.3463	2_AC2	amino_acids
aaB	23.2594	2_PM1	amino_acids
aaB	228.592	11_CM1	amino_acids
aaB	97.7311	11_ACL1	amino_acids
aaB	71.5781	11_CL1	amino_acids
aaB	128.77	11_PL2	amino_acids
aaB	95.5316	14_CM2	amino_acids
aaB	86.293	14_CDL2	amino_acids
aaB	299.292	14_PM2	amino_acids
aaB	227.256	14_CAC2	amino_acids
aaB	47.3026	14_CVLA	amino_acids
aaB	53.6387	14_PL2	amino_acids
aaB	231.719	14_PVM	amino_acids
aaB	675.857	15_CM2	amino_acids
aaB	158.596	15_CAC	amino_acids
aaB	65.9276	15_ACM1	amino_acids
aaB	94.5967	15_ACM2	amino_acids
aaB	124.359	15_CMV	amino_acids
aaB	52.5594	15_ACC2	amino_acids
aaB	110.119	16_CM1	amino_acids
aaB	518.264	16_CM2	amino_acids
aaB	20.572	16_ACL1	amino_acids
aaC	168.941	1_PM1	amino_acids
aaC	153.571	1_ACM	amino_acids
aaC	102.219	1_CM2	amino_acids
aaC	29688	1_ACM2	amino_acids
aaC	178.91	2_PM1	amino_acids
aaC	111.771	2_PL1	amino_acids
aaC	428.92	2_CP2	amino_acids
aaC	183.986	2_AC2	amino_acids
aaC	199.273	2_ACL2	amino_acids
aaC	555.642	10_CCP	amino_acids
aaC	33.4306	10_CL1	amino_acids
aaC	78.8353	10_CP1	amino_acids
aaC	150.714	10_ADL1	amino_acids
aaC	103.281	10_ACL2	amino_acids
aaC	357.824	10_CAC2	amino_acids
aaC	69.6252	11_MCC	amino_acids
aaC	48.8659	11_CM1	amino_acids
aaC	20.084	11_ACC1	amino_acids
aaC	77.9935	11_ADL	amino_acids
aaC	105.886	11_CP1	amino_acids
aaC	221.788	11_ACL1	amino_acids
aaC	61.9904	11_ACC2	amino_acids
aaC	83.0959	11_PL2	amino_acids
aaC	117.552	11_CMV	amino_acids
aaC	156.789	15_PM1	amino_acids
aaC	64.1321	15_CP1	amino_acids
aaC	84.6132	15_CCP	amino_acids
aaC	183.829	15_CM2	amino_acids
aaC	107.053	15_PM2	amino_acids
aaC	98.6077	15_ACM2	amino_acids
aaC	74.6917	15_CVL	amino_acids
aaC	258.169	15_CMV	amino_acids
aaC	223.078	16_CM1	amino_acids
aaC	471.527	16_CM2	amino_acids
aaC	455.744	16_ACC2	amino_acids
aaD	96.7024	1_ACM	amino_acids
aaD	1432.98	1_ACM2	amino_acids
aaD	48.406	2_ACL1	amino_acids
aaD	49.9509	2_MCC	amino_acids
aaD	64.1199	2_ACM1	amino_acids
aaD	55.7014	2_ACM1	amino_acids
aaD	60.5006	2_PL1	amino_acids
aaD	189.719	10_CCP	amino_acids
aaD	237.946	10_PL2	amino_acids
aaD	66.8455	CP1	amino_acids
aaD	76.6173	10_CDL2	amino_acids
aaD	394.979	10_CAC2	amino_acids
aaD	146.933	11_CCP	amino_acids
aaD	26.1681	14_CDL1	amino_acids
aaD	90.4658	14_CP1	amino_acids
aaD	140.285	14_CL1	amino_acids
aaD	119.119	14_CL2	amino_acids
aaD	40.6302	15_CM2	amino_acids
aaD	44.1548	15_CAC	amino_acids
aaD	57.0248	15_PM2	amino_acids
aaD	83.4575	15_CMV	amino_acids
aaD	34.8202	15_ACC2	amino_acids
aaD	64.9825	15_CVLA	amino_acids
aaD	91.751	15_PL2	amino_acids
aaD	251.333	16_CM1	amino_acids
aaD	199.618	16_CM2	amino_acids
aaD	114.885	16_CMV	amino_acids
high_salts	92.5417	1_ACC1	high_salts
high_salts	254.498	1_CDL2	high_salts
high_salts	835.034	1_CAC	high_salts
high_salts	33.1198	1_PM1	high_salts
high_salts	164.704	1_AC1	high_salts
high_salts	1352.38	1_CAC2	high_salts
high_salts	109.655	1_CVL	high_salts
high_salts	664.192	1_ACM2	high_salts
high_salts	107.972	2_CDL1	high_salts
high_salts	105.689	2_MCC	high_salts
high_salts	1472.77	2_ACC1	high_salts
high_salts	21.5255	2_ADL	high_salts
high_salts	120.55	2_ACL2	high_salts
high_salts	40.9078	2_PL1	high_salts
high_salts	347.899	2_CP2	high_salts
high_salts	52.2845	2_CM2	high_salts
high_salts	36.1052	2_PM1	high_salts
high_salts	3750.95	15_PM1	high_salts
high_salts	234.013	15_CP1	high_salts
high_salts	297.355	15_CCP	high_salts
high_salts	156.533	15_CM2	high_salts
high_salts	169.03	15_PL1	high_salts
high_salts	260.816	15_PM2	high_salts
high_salts	136.118	late	high_salts
high_salts	63.0824	16_CM1	high_salts
high_salts	256.925	16_CM2	high_salts
high_salts	82.8518	16_CAC2	high_salts
high_salts	268.483	16_CVL	high_salts
high_salts	67.8964	16_CMV	high_salts
high_salts	152.903	16_CVLA	high_salts
high_salts	1425.98	CDL	high_salts
high_salts	511.867	PM1	high_salts
high_salts	548.251	PM2	high_salts
high_salts	143.306	ADL	high_salts
high_salts	224.219	ADL2	high_salts
low_salts	53.6849	1_CDL2	low_salts
low_salts	1056.34	1_CPC	low_salts
low_salts	106.166	2_PL1	low_salts
low_salts	345.19	2_CP2	low_salts
low_salts	119.774	2_AC2	low_salts
low_salts	38.4018	2_PM1	low_salts
low_salts	141.788	10_CCP	low_salts
low_salts	280.164	10_PL2	low_salts
low_salts	123.188	10_CP1	low_salts
low_salts	39.7985	10_ACL2	low_salts
low_salts	133.587	10_CDL2	low_salts
low_salts	319.835	10_CAC2	low_salts
low_salts	30.5966	14_ACM1	low_salts
low_salts	37.1496	14_CCC	low_salts
low_salts	209.772	15_CM2	low_salts
low_salts	76.3432	15_CL1	low_salts
low_salts	111.033	16_CM1	low_salts
low_salts	90.7102	16_CP2	low_salts
low_salts	272.224	16_ACC2	low_salts
low_salts	381.24	16_CM2	low_salts
low_salts	98.7835	CDL	low_salts
low_salts	29.3942	ADL	low_salts
sugarsdi	109.797	1_PM1	sugar
sugarsdi	204.042	2_PL1	sugar
sugarsdi	102.668	2_CP2	sugar
sugarsdi	198.433	2_AC2	sugar
sugarsdi	143.169	2_PM1	sugar
sugarsdi	345.567	10_CP2	sugar
sugarsdi	90.1559	10_CP1	sugar
sugarsdi	58.3725	10_CL1	sugar
sugarsdi	42.8365	10_CDL2	sugar
sugarsdi	56.4684	10_CMV	sugar
sugarsdi	158.094	11_PL2	sugar
sugarsdi	39.3818	14_CM2	sugar
sugarsdi	105.61	14_ACM1	sugar
sugarsdi	115.258	14_ACL2	sugar
sugarsdi	176.403	14_PL2	sugar
sugarsdi	94.5578	15_CVL	sugar
sugarsdi	165.688	15_CM2	sugar
sugarsdi	131.71	16_CP2	sugar
sugarsdi	409.824	16_CM2	sugar
sugarsdi	63.7452	16_ACC2	sugar
sugarsdi	21.1124	MCC	sugar
sugarsmono	44.3769	1_PM1	sugar
sugarsmono	406.853	1_AC1	sugar
sugarsmono	541.225	1_ACM2	sugar
sugarsmono	520.449	1_AC2	sugar
sugarsmono	131.219	2_MCC	sugar
sugarsmono	82.5953	2_ACL1	sugar
sugarsmono	34.246	2_CP2	sugar
sugarsmono	136.461	2_AC2	sugar
sugarsmono	114.721	2_CAC1	sugar
sugarsmono	64.1378	10_CCP	sugar
sugarsmono	146.671	10_CP1	sugar
sugarsmono	60.659	10_CL1	sugar
sugarsmono	172.703	10_CAC2	sugar
sugarsmono	32.7603	11_MCC	sugar
sugarsmono	55.8572	11_CP1	sugar
sugarsmono	40.8239	11_PM1	sugar
sugarsmono	81.23	14_CDL1	sugar
sugarsmono	206.345	14_PL2	sugar
sugarsmono	23.7951	15_CAC	sugar
sugarsmono	34.2094	15_CM2	sugar
sugarsmono	20.7133	15_ACM1	sugar
sugarsmono	49.3309	15_PM2	sugar
sugarsmono	48.6338	15_CVL	sugar
sugarsmono	32.8039	16_CM1	sugar
sugarsmono	99.0821	16_CP2	sugar
sugarsmono	25.7346	16_ACL1	sugar
sugarsmono	55.9701	ACC1	sugar
sugarsmono	56.2188	ACM1	sugar
sugarsmono	87.2177	ACC2	sugar

## Sheet: Fig2C-groups_sugar_bitter
Responsive neurons from organs stimulated with sugar and bitter tastant groups - Fig.2C
Taste group	DF/F0%	cell_name_in_prep	modality
sugarsdi	90.0627	4_PL1	sugars
sugarsmono	75.6514	4_CM2	sugars
sugarsmono	90.3135	4_PL1	sugars
sugarsdi	41.3298	5_CDL1	sugars
sugarsdi	646.961	5_CAC2	sugars
sugarsmono	43.3603	5_CDL1	sugars
sugarsmono	77.7472	5_CAC1	sugars
sugarsmono	646.961	5_CAC2	sugars
sugarsdi	90.6298	7_CDL2	sugars
sugarsdi	48.983	7_ACM2	sugars
sugarsdi	62.2693	7_ACL1	sugars
sugarsmono	35.9914	7_CM2	sugars
sugarsmono	66.6846	7_AC2	sugars
sugarsdi	81.5334	8_CAC1	sugars
sugarsdi	115.746	8_ACC1	sugars
sugarsmono	36.9143	8_ACC1	sugars
sugarsmono	52.6595	8_CL1	sugars
sugarsdi	140.302	9_AC1	sugars
sugarsdi	83.4703	9_CM2	sugars
sugarsdi	84.9203	9_AC2	sugars
sugarsdi	196.64	9_PL2	sugars
sugarsdi	44.3142	9_ACL1	sugars
sugarsmono	53.747	9_CM1	sugars
sugarsmono	33.6039	9_AC1	sugars
sugarsmono	91.4901	9_PL2	sugars
sugarsdi	21.1124	MCC	sugars
sugarsmono	55.9701	ACC1	sugars
sugarsmono	56.2188	ACM1	sugars
sugarsmono	87.2177	ACC2	sugars
bittersDSoTC	85.3537	4_PL1	bitters
bittersDSoTC	204.897	4_CL2	bitters
bittersQLSC	95.6708	4_PL1	bitters
bittersDSoTC	25.8275	5_CCD1	bitters
bittersDSoTC	260.894	5_AC2	bitters
bittersDSoTC	495.216	5_CAC2	bitters
bittersQLSC	28.6334	5_CDL1	bitters
bittersQLSC	37.1163	5_CAC2	bitters
bittersDSoTC	24.9918	7_CDL2	bitters
bittersDSoTC	44.52	7_AC2	bitters
bittersDSoTC	103.974	7_CVC	bitters
bittersDSoTC	42.4587	7_CP2	bitters
bittersDSoTC	31.3838	8_ACC2	bitters
bittersDSoTC	76.1649	8_CL1	bitters
bittersQLSC	44.7948	8_ACC1	bitters
bittersQLSC	35.0502	8_CL1	bitters
bittersQLSC	88.7627	8_ACM2	bitters
bittersQLSC	46.0242	9_AC1	bitters
bittersQLSC	91.5593	9_ACC2	bitters
bittersQLSC	78.0246	9_PL2	bitters
bittersDSoTC	77.8074	ACC1	bitters
bittersDSoTC	287.65	CM2	bitters
bittersDSoTC	182.846	CDL2	bitters
