# Supplementary material for: Taste sensing and sugar detection mechanisms in Drosophila larval primary taste center
Source: eLife journal article supplement (doi:10.7554/elife.67844), 2021-12-03
Supplement: supp [file elife-67844-supp-v1.zip › elife_poa_e67844_Figure_2_source_data_2.xlsx]

## Sheet: Fig.3Suppl - mapping
A.
Data Figure 2 D' - ON activation responses ("canonical" clacium imaging signals)
pooled responses for plotting, no mapping - cell names not matched across organs
ON responses:	275 responses > 20% DF/F0
	197 reponding neurons, 15 N (15 recorded taste organs)
B.
Data Figure 3 - Supplement, mapping - ON and OFF/late responses (all activation clacium imaging signals)
mapped responses for plotting
ON responses + OFF/late responses:	331 responses > 20% DF/F0
	227 reponding neurons, 15 N (15 recorded taste organs)
n/a = no allocated mapped_name
'-'' = response < 20% DF/F0
A.	B.	Tastant activation - ON response or OFF/late response
cell_name_in_prep	map_cell_name	sucrose	denatonium	quinine	valine	arginine	cia	lowsalt	highsalt
1_PM2	PM2	218.213	-	-	84.4877	-	114.956	-	59.7479
11_CMM	MCC	84.4558	-	-	-	377.345	197.806	176.321	-
5_CM2	CM2	30.6632	-	-	26.7818	-	31.008	-	21.2853
3_CDL1	CDL1	31.2798	-	-	36.5305	-	-	-	58.3239
4_CL2	CL2	-	43.5812	-	85.0102	-	-	-	84.2916
4_CVL	CPV	-	-	-	55.5801	-	121.442	-	83.9088
5_CP1	CP1	111.253	42.3311	-	-	-	-	-	27.9491
7_CVL	CVL	38.2332	44.2372	-	-	-	-	-	81.1629
10_CPV	CPV	50.5723	-	34.0956	-	-	123.062	-	-
12_PM2	PM2	-	-	-	-	311.161	124.674	189.174	-
8_PM1	MCC	33.0903	-	91.8315	-	930.298	293.276	-	-
3_CL2	CL2	50.2893	-	-	-	-	31.283	-	245.828
4_CDL2	CDL2	63.2088	-	-	27.0035	-	-	-	-
5_CDL2	CDL2	53.9739	-	-	22.577	-	-	-	-
1_CL2	CL2	-	82.6062	-	-	-	29.3413	-	76.8146
1_CP2	CP2	-	38.8323	-	-	-	-	-	30.9499
2_CP1	CP1	61.1741	21.2038	-	-	-	-	-	78.3194
6_PM2	PM2	103.588	-	-	-	-	200.877	-	-
7_ADL	ADL	74.8914	-	-	-	-	-	-	285.04
1_PM1	MPC	-	-	-	38.127	-	62.2156	-	-
2_AC1	AC1	41.33	-	-	-	-	-	-	70.149
2_ACL1	CDL1	-	-	-	-	-	30.3603	-	67.7476
2_ADL	ADL	37.8729	-	-	85.1504	-	-	-	-
2_CCV	CVL	-	22.106	-	-	-	-	-	51.8085
2_CP2	CPV	-	-	-	-	-	39.0128	-	164.423
3_ACL2	ACV	27.9958	-	-	-	-	-	-	655.595
3_CCD	n/a	45.1167	-	-	-	-	-	-	52.4274
3_CP2	PL2	-	-	-	47.107	-	-	-	76.4211
3_MCC	MCC	44.0754	-	-	-	-	-	-	25.4
3_PM2	PM2	77.0461	-	-	-	-	95.6825	-	-
4_CP1	CP1	74.236	-	-	-	-	-	-	80.7925
4_PM1	MCC	-	-	-	-	-	101.959	-	39.2286
4_PM2	PM2	33.1445	-	-	-	-	-	-	220.151
5_ACL1	ADL	35.6377	-	-	-	-	26.1316	-	-
5_ADL	CDL1	24.1255	-	-	25.1554	-	-	-	-
6_AC1	AC1	-	-	-	61.573	-	-	-	172.777
6_CPP	CPP	112.732	30.748	-	-	-	-	-	-
6_PL1	PL1	96.3281	-	-	-	-	-	-	64.3747
7_AC1	AC1	-	-	-	-	-	76.6216	-	73.5165
7_AC2	ACV	-	-	-	-	-	32.1092	-	65.0862
15_ACM2	ACM2	68.5612	-	-	-	25.2107	-	107.522	-
10_CMM	MCC	81.5818	-	-	-	-	-	25.4853	-
11_PL1	PL1	-	-	48.7707	-	-	79.4405	-	-
12_CPV	CPV	-	-	73.6555	-	-	-	32.7327	-
13_AC2	AC2	-	-	111.055	-	90.6659	-	125.945	-
13_CM1	CM1	50.2109	-	-	-	26.225	-	36.6505	-
13_CPP	CPP	61.6809	-	129.447	-	-	-	-	-
14_CAC2	ACV	80.0379	-	-	-	35.0906	-	39.6622	-
15_ACL2	ACL2	-	-	-	-	69.3591	-	38.1973	-
15_PM2	PM2	21.334	-	49.4543	-	282.781	-	-	-
8_CL2	CL2	37.883	-	-	-	-	99.056	28.8108	-
8_PL2	PL2	67.8372	-	-	-	-	-	32.9037	-
11_CM2	CM2	-	-	-	-	563.308	-	187.373	-
11_CMV	CMV	-	-	-	-	72.2847	-	46.0769	-
11_DPL1	CP1	21.3652	-	26.6536	-	-	-	-	-
12_ACM1	ACM2	-	-	-	-	891.318	-	452.266	-
12_ADL	n/a	-	-	-	-	280.937	-	193.433	-
13_AC1	AC1	57.4435	-	-	-	-	-	430.5	-
14_CPP	CPP	-	-	74.9551	-	-	-	77.4089	-
14_PM1	MCC	37.3103	-	-	-	366.387	-	-	-
15_CMV	CMV	-	-	-	-	47.6407	-	42.755	-
15_CPV	CPV	48.6484	-	-	-	46.9529	-	-	-
8_DPL2	CDL2	29.9283	-	-	-	-	-	39.6982	-
9_PM1	CM1	48.9708	-	-	-	-	-	28.2837	-
9_PM2	PM2	106.586	-	-	-	-	101.808	-	-
6_CDL2	CDL2	76.1916	134.502	-	31.2296	-	-	-	-
7_CDL2	CDL2	-	22.8822	-	-	-	-	-	-
1_AC2	AC2	-	105.792	-	-	-	-	-	40.8183
1_CM2	CM2	217.38	179.679	-	-	-	-	-	-
2_CM1	n/a	54.1473	-	-	-	-	-	-	-
7_CL2	CL2	-	-	-	-	-	65.0752	-	383.762
2_AC2	AC2	-	128.021	-	-	-	-	-	162.276
2_PM2	PM2	-	-	-	-	-	78.4511	-	37.5682
5_CM1	CM1	50.1315	-	-	-	-	-	-	-
5_CVL	n/a	-	-	-	-	-	27.8582	-	-
5_CVLP	CPV	-	-	-	31.1993	-	-	-	94.5574
6_ADL	ADL	-	-	-	-	-	51.2734	-	-
6_CDL	CDL1	-	-	-	21.2776	-	71.3736	-	-
6_CP1	CP1	-	-	-	-	-	26.66	-	106.107
6_PM1	PM1	-	-	-	20.475	-	-	-	104.152
1_AC1	AC1	-	87.2248	-	-	-	-	-	-
1_ACC1	ACC1	-	-	-	-	-	-	-	818.292
1_ACC2	ACV	-	-	-	-	-	-	-	26.649
1_ACL2	n/a	-	-	-	-	-	-	-	38.8113
1_ACM2	ACM2	-	-	-	31.2874	-	-	-	-
2_ACC1	ACC1	-	-	-	-	-	-	-	285.701
2_ACC2	ACC2	-	-	-	-	-	-	-	111.261
2_ACM1	ACM1	50.9872	-	-	-	-	-	-	-
2_ACV	ACV	24.571	-	-	-	-	-	-	-
2_CCVC	n/a	-	-	-	-	-	-	-	44.4015
2_CDL	PM1	-	-	-	62.5912	-	-	-	-
2_CDL1	n/a	55.9619	-	-	-	-	-	-	-
2_CL1	CL1	53.927	-	-	-	-	-	-	-
2_CL2	CL2	-	-	-	-	-	34.7395	-	-
2_CLV	CVL	-	-	-	-	-	-	-	164.528
2_MCC	MCC	266.753	-	-	-	-	-	-	-
2_PL2	PL2	-	-	-	-	-	-	-	92.6974
3_AC1	AC1	41.491	-	-	-	-	-	-	-
3_AC2	AC2	-	-	-	-	-	-	-	25.4865
3_ACL1	ADL	-	-	-	-	-	27.9918	-	-
3_ACM2	ACM2	-	-	-	-	-	-	-	93.9499
3_CCP	PM1	-	-	-	21.8021	-	-	-	-
3_CM2	CM2	-	-	-	-	-	-	-	154.942
3_CVC	CVL	-	-	-	-	-	-	-	27.0426
3_MAC	MAC	39.5056	-	-	-	-	-	-	-
3_PM1	n/a	42.755	-	-	-	-	-	-	-
4_AC1	ACM1	26.9586	-	-	-	-	-	-	-
4_AC2	ACM2	-	-	-	-	-	24.8027	-	-
4_ACM1	n/a	-	-	-	-	-	-	-	515.664
4_ADL	ADL	40.4033	-	-	-	-	-	-	-
4_CDL	CDL1	-	-	-	-	-	-	-	186.248
4_CL1	CL1	78.3542	-	-	-	-	-	-	-
4_CLV	n/a	-	-	-	71.4222	-	-	-	-
4_CM1	CM1	26.8335	-	-	-	-	-	-	-
4_CM2	CM2	-	-	-	-	-	-	-	65.5267
4_CMV	CMV	-	-	-	-	-	42.5297	-	-
4_CP2	CP2	-	-	-	-	-	52.3954	-	-
4_MCC	n/a	-	-	-	-	-	-	-	149.046
5_AC2	AC2	-	-	-	-	-	32.5976	-	-
5_ACC1	ACC1	-	-	-	-	-	-	-	367.617
5_ACL2	ACL2	-	-	-	-	-	-	-	32.4303
5_ACM1	AC1	30.5568	-	-	-	-	-	-	-
5_ACM2	ACV	49.2922	-	-	-	-	-	-	-
5_MCC	MCC	28.8456	-	-	-	-	-	-	-
5_PL1	PL1	-	-	-	29.693	-	-	-	-
5_PL2	PL2	-	57.3353	-	-	-	-	-	-
5_PM1	PM1	80.5871	-	-	-	-	-	-	-
5_PM2	PM2	-	-	-	-	-	151.603	-	-
6_AC2	AC2	-	-	-	86.7194	-	-	-	-
6_ACV	ACV	92.5659	-	-	-	-	-	-	-
6_CDL1	n/a	61.8772	-	-	-	-	-	-	-
6_CL1	CL1	118.578	-	-	-	-	-	-	-
6_CM1	CM1	-	-	-	-	-	-	-	636.097
6_CM2	CM2	66.3158	-	-	-	-	-	-	-
6_CVL	CVL	-	35.4401	-	-	-	-	-	-
7_ACL2	ACL2	-	-	-	-	-	-	-	701.292
7_CDL	CDL1	-	-	-	-	-	36.0096	-	-
7_CMV	CMV	-	-	-	-	-	-	-	23.5
7_CP1	PL1	-	-	-	-	-	-	-	112.479
7_CP2	CPV	-	-	-	-	-	-	-	79.6122
12_DPL2	CDL2	-	-	104.817	-	-	-	-	-
15_DPL1	CDL1	-	-	23.3435	-	-	30.4873	-	-
9_PL2	PL2	63.5159	-	201.239	-	-	-	-	-
11_DPL2	CDL2	-	-	184.6	-	-	-	-	-
15_CM1	ACM1	-	-	25.4801	-	395.875	-	-	-
8_CMV	CMV	-	-	-	-	141.507	-	-	-
11_CL2	CL2	-	-	-	-	-	175.393	22.8244	-
11_CPV	CPV	34.2992	-	-	-	-	-	-	-
12_CM1	AC1	-	-	-	-	299.866	-	109.702	-
12_CMV	CMV	-	-	66.1736	-	80.6504	-	-	-
12_DPL1	CDL1	-	-	-	-	-	33.969	-	-
13_DPL2	CDL2	-	-	-	-	-	74.9547	-	-
14_CP1	PM1	-	-	-	-	501.083	-	-	-
14_CPV	n/a	-	-	38.9688	-	-	-	-	-
14_DPL1	CP1	34.1749	-	-	-	33.0285	-	-	-
15_CPC	CP1	22.4345	-	-	-	34.965	-	-	-
8_DPL1	CDL1	-	-	-	-	-	-	20.353	-
9_ACL1	ADL	21.5458	-	-	-	-	-	-	-
9_CL1	CL1	-	-	-	-	-	306.05	-	-
10_AC1	AC1	52.3025	-	-	-	-	-	-	-
10_ACL1	ACL	92.7316	-	-	-	-	-	-	-
10_ACL2	n/a	57.6799	-	-	-	-	-	-	-
10_CCV	n/a	-	-	-	-	-	-	44.2144	-
10_DPL1	CDL1	32.7549	-	-	-	-	-	-	-
11_AC2	AC2	-	-	-	-	77.9454	-	-	-
11_CCV	n/a	-	-	-	-	45.7257	-	-	-
11_CL1	n/a	-	-	-	-	-	50.1469	-	-
11_PM1	CM1	35.6935	-	-	-	-	-	-	-
12_AC1	AC2	42.7136	-	-	-	-	-	-	-
12_AC2	ACV	-	-	46.9229	-	-	-	-	-
12_ACL1	ACL	-	-	-	-	-	177.164	-	-
12_CM2	CM2	-	-	-	-	-	27.6938	-	-
12_CPV2	CPV2	-	-	-	-	-	41.5521	-	-
12_PM1	PM1	-	-	-	-	35.4566	-	-	-
13_CL1	CDL1	-	-	-	-	-	41.3069	-	-
13_CL2	CL1	-	-	-	-	-	343.115	-	-
13_CPV	CPV	-	-	-	-	-	451.649	-	-
13_DPL1	CP1	-	-	-	-	-	34.6271	-	-
14_CAC	AC1	51.7464	-	-	-	-	-	-	-
14_CCV	n/a	21.2056	-	-	-	-	-	-	-
14_CMM	ACM1	28.2968	-	-	-	-	-	-	-
14_PL1	PL1	-	-	31.0714	-	-	-	-	-
14_PM2	PM2	-	-	-	-	212.559	-	-	-
15_AC1	ACC1	26.8285	-	-	-	-	-	-	-
15_AC2	ACV	-	-	-	-	-	-	75.1821	-
15_CL2	CL2	-	-	-	-	169.905	-	-	-
15_CM2	CM2	-	-	-	-	39.3111	-	-	-
15_CMM	CM1	59.7026	-	-	-	-	-	-	-
8_ACM1	ACM1	28.5171	-	-	-	-	-	-	-
8_CL1	ADL	-	-	63.5772	-	-	-	-	-
8_CM2	CM2	-	-	-	-	404.342	-	-	-
8_CP1	CP1	21.236	-	-	-	-	-	-	-
8_CPC	PM1	54.5199	-	-	-	-	-	-	-
9_ACL2	ACC1	-	-	-	-	-	35.8067	-	-
9_ACM1	ACM1	-	-	-	-	-	-	64.5856	-
9_PL1	CP1	-	-	-	-	21.1995	-	-	-
3_ACC1	ACC1	52.2462	-	-	-	-	-	-	-
3_CDL2	CDL2	48.0794	-	-	-	-	-	-	-
2_ACL2	CDL2	-	-	-	-	-	-	-	-
6_PL2	PL2	-	-	-	-	-	28.241	-	-
1_CC2	CDL2	-	111.599	-	-	-	-	-	-
4_PL1	CPP	-	-	-	-	-	-	-	-
1_CCP	PM1	-	146.125	-	-	-	-	-	-
1_CP1	CP1	-	59.824	-	-	-	-	-	-
1_CVL	CPV	-	-	-	-	-	-	-	-
1_MCC	MCC	-	310.618	-	-	-	-	-	-
3_ACV	CCV	60.0237	-	-	-	-	-	-	-
5_CAC2	n/a	-	-	-	-	-	24.1639	-	-
5_CDL	n/a	-	-	-	-	-	45.252	-	-
7_ACC1	n/a	-	-	-	-	-	-	-	-
7_CDL1	n/a	-	-	-	-	-	-	-	-
7_CM2	CM2	-	-	-	-	-	-	-	-
15_DPL2	CDL2	-	-	-	-	-	-	23.4582	-
14_DPL2	CDL2	-	-	-	-	-	-	115.075	-
9_DPL2	CDL2	-	-	-	-	-	-	-	-
10_ACC	AC2	-	-	-	-	416.512	-	-	-
10_PL1	n/a	-	-	-	-	-	-	-	-
11_ACC	AC1	38.2277	-	-	-	-	-	-	-
11_ACL1	CL1	-	-	-	-	-	-	-	-
11_CPP	n/a	-	-	-	-	-	-	-	-
11_CVL	n/a	-	-	-	-	-	-	-	-
11_PL2	n/a	-	-	-	-	-	-	-	-
14_CVL	n/a	-	-	-	-	-	-	51.9916	-
8_CPV	n/a	-	-	-	-	-	-	-	-
8_PL1	PL1	-	-	-	-	-	-	-	-
9_CL2	CL2	-	-	-	-	-	-	-	-
9_CMV	CMV	-	-	-	-	-	-	164.746	-
