# Supplementary material for: Taste sensing and sugar detection mechanisms in Drosophila larval primary taste center
Source: eLife journal article supplement (doi:10.7554/elife.67844), 2021-12-03
Supplement: supp [file elife-67844-supp-v1.zip › elife_poa_e67844_Figure_3_source_data_1.xlsx]

## Sheet: resp_mapped_cells_Fig3&Suppl
Data used for plotting - mapped responses, Fig.3 - Suppl.1 C	tastant
map_cell_name	sucrose	denatonium	quinine	valine	arginine	cia	low salt	high salt
PM2	218.213					114.956
	103.588					95.6825
	77.0461					151.603
	33.1445					124.674
	21.334					101.808
	106.586
MCC	44.0754
	266.753
	28.8456
	84.4558
	33.0903
	81.5817
	37.3103
CVL		44.2372						81.1629
		35.4401						164.528
		22.106						27.0426
								51.8085
CPV						121.442		83.9088
						39.0128		164.423
						123.062		94.5574
						451.649		79.6121
CP1	61.1741	42.3311						78.3194
	111.253	21.2038						27.9491
	74.236	59.824						80.7925
	34.1749							106.107
	21.3652
	22.4345
	21.236
CMV					141.507
					72.2847
					80.6504
					47.6407
CM1	54.1473
	50.1315
	26.8335
	50.2109
	48.9708
	35.6935
	59.7026
CL2						29.3413		245.828
						34.7394		76.8145
						175.393		84.2916
						31.283		383.762
						65.0752
						99.0559
CDL2									a.sucrose	a.denatonium	a.quinine	a.valine	a.arginine	a.sour	a.low salt	a.high salt
									-52.9084					-45.5897	-81.1946
									-48.4098					-30.5886	-52.7169
									-49.2616					-44.8471	-56.0605
									-70.5222					-36.364	-64.5463
									-27.2769					-21.5051
									-41.8814					-56.9063
									-58.9311					-26.8671
														-33.9116
														-25.5111
CDL1						30.3604
						71.3736
						36.0096
						30.4873
						33.969
						41.3069
ADL	74.8914
	37.8729
	35.6377
	40.4033
	21.5458
ACV	27.9958
	24.5709
	49.2922
	92.566
	80.0379
ACM1	50.9872
	26.9586
	28.2968
	28.5171
AC1	41.33
	41.491
	30.5568
	57.4436
	52.3025
	38.2277
	51.7464
