# Supplementary material for: Taste sensing and sugar detection mechanisms in Drosophila larval primary taste center
Source: eLife journal article supplement (doi:10.7554/elife.67844), 2021-12-03
Supplement: supp [file elife-67844-supp-v1.zip › elife_poa_e67844_Figure_4_figure_supplement_1_source_data_1.xlsx]

## Sheet: behavior - fig4 Suppl1
Fig.4 - Figure Supplement 1
2-choice assay on 25 cm petri dishes
L3 larvae, 4 day old, normally fed
SupplFig4A
Preferrence to Sucrose 500mM, 2.5%
5minute preferrence
UAS-TNTE/+		(C1,C2,C3,C4)-Gal4/+	(C1,C2,C3,C4)-Gal4 > UAS-TNTE		(C1,C2,C4)-Gal4/+	(C1,C2,C4)-Gal4 > UAS-TNTE		C5-Gal4(III)/+	C5-Gal4(III) > UAS-TNTE
0.233333		0.714286	0		0.8	0.566667		0.7	0.433333
0.9		0.178571	0.4		0.466667	0.266667		0.333333	-0.233333
0.133333		0.0333333	0.46875		0.25	0.307692		0.566667	0.2
-0.166667		0.0666667	0.666667		0.233333	0.233333		0.666667	0.6
0.333333		0.633333	0		0.56	0		0.766667	0.766667
0.3		0.166667	-0.2			0.178571		0.633333	0.3
0.2		0.8	0.333333			-0.166667		0.133333	0.433333
0.633333		0.2	0.1					0.6	0.0666667
0.8		0.833333	0.1					0.166667	0.4
0.5		0.533333	0.461538					0.8	0.233333
Anova p-val
(C1,C2,C3,C4) genotypes: 0.3688
(C1,C2,C4) genotypes: 0.2471
C5 genotypes: 0.2344
SupplFig4B
Gr43a - mutant and rescue
Preferrence to Sucrose 100mM
2.5%										1%
rescue: Gr43a-KI; Gr43aUAS x Gr43a-KI; + 2m	mutant ctrl: Gr43a-KI x Gr43a-KI;Cha7.4kb-Gal80 2m	rescue: Gr43a-KI; Gr43aUAS x Gr43a-KI; + 5m	mutant ctrl: Gr43a-KI x Gr43a-KI;Cha7.4kb-Gal80 5m	rescue: Gr43a-KI; Gr43aUAS x Gr43a-KI; + 15m	mutant ctrl: Gr43a-KI x Gr43a-KI;Cha7.4kb-Gal80 15m					rescue: Gr43a-KI; Gr43aUAS x Gr43a-KI; + 2m	mutant ctrl: Gr43a-KI x Gr43a-KI;Cha7.4kb-Gal80 2m	rescue: Gr43a-KI; Gr43aUAS x Gr43a-KI; + 5m	mutant ctrl: Gr43a-KI x Gr43a-KI;Cha7.4kb-Gal80 5m	rescue: Gr43a-KI; Gr43aUAS x Gr43a-KI; + 15m	mutant ctrl: Gr43a-KI x Gr43a-KI;Cha7.4kb-Gal80 15m
-0.357143	0.333333	-0.366667	0.0666667	0.0666667	-0.0333333					0.4	0.333333	0.333333	0.666667	0.533333	0.8
0.1	-0.433333	-0.0333333	0.0666667	-0.233333	0.166667					0.533333	0.366667	0.566667	0.4	0.6	0.4
0.466667	-0.1	0.4	0.2	-0.0666667	0.566667					0.366667	-0.466667	0.166667	-0.166667	0.633333	-0.166667
0.466667	0.166667	0.633333	0.4	0.433333	0.6					0.0333333	-0.0333333	0.233333	-0.166667	0.666667	-0.0666667
0.2	0.4	0.3	0.266667	0.9	0.366667					0.3	0.333333	0.333333	0.3	0.0333333	0.166667
0.266667	-0.0666667	0.233333	0.1	0.266667	0.3					0.366667	0.433333	0.733333	0.3	0.6	0.333333
0.3	0.233333	0.333333	-0.1	0.733333	-0.1					-0.0666667	0.125	0.466667	-0.0833333	0.8	-0.375
mutant vs rescue "Mann Whitney test" p-val 0.3642		mutant vs rescue "Mann Whitney test" p-val 0.3992		mutant vs rescue "Mann Whitney test" p-val >0.9999						mutant vs rescue "Mann Whitney test" p-val 0.5134		mutant vs rescue "Mann Whitney test" p-val 0.1946		mutant vs rescue "Mann Whitney test" p-val 0.0571
SupplFig4B
Gr43a - mutant and rescue
Preferrence to Sucrose 500mM
2.5%										1%
rescue: Gr43a-KI; Gr43aUAS x Gr43a-KI; + 2m	mutant ctrl: Gr43a-KI x Gr43a-KI;Cha7.4kb-Gal80 2m	"brain only": Gr43a-KI; Gr43aUAS x Gr43a-KI; Cha7.4kb-Gal80 2m	rescue: Gr43a-KI; Gr43aUAS x Gr43a-KI; + 5m	mutant ctrl: Gr43a-KI x Gr43a-KI;Cha7.4kb-Gal80 5m	"brain only": Gr43a-KI; Gr43aUAS x Gr43a-KI; Cha7.4kb-Gal80 5m	rescue: Gr43a-KI; Gr43aUAS x Gr43a-KI; + 15m	mutant ctrl: Gr43a-KI x Gr43a-KI;Cha7.4kb-Gal80 15m	"brain only": Gr43a-KI; Gr43aUAS x Gr43a-KI; Cha7.4kb-Gal80 15m		rescue: Gr43a-KI; Gr43aUAS x Gr43a-KI; + 2m	mutant ctrl: Gr43a-KI x Gr43a-KI;Cha7.4kb-Gal80 2m	"brain only": Gr43a-KI; Gr43aUAS x Gr43a-KI; Cha7.4kb-Gal80 2m	rescue: Gr43a-KI; Gr43aUAS x Gr43a-KI; + 5m	mutant ctrl: Gr43a-KI x Gr43a-KI;Cha7.4kb-Gal80 5m	"brain only": Gr43a-KI; Gr43aUAS x Gr43a-KI; Cha7.4kb-Gal80 5m	rescue: Gr43a-KI; Gr43aUAS x Gr43a-KI; + 15m	mutant ctrl: Gr43a-KI x Gr43a-KI;Cha7.4kb-Gal80 15m	"brain only": Gr43a-KI; Gr43aUAS x Gr43a-KI; Cha7.4kb-Gal80 15m
0.166667	0.166667	0.466667	0.3	-0.333333	0.4	0.266667	0.2	0.166667		0.4	0.3	0.454545	0.7	0.6	0.181818	0.2	0.7	0.681818
0.233333	0.0333333	0.433333	0.466667	-0.133333	0.3	0.733333	0.466667	0.333333		0.566667	0.7	0.433333	0.866667	0.9	0.666667	0.433333	0.9	0.633333
0.133333	0.366667	0.233333	0.7	-0.1	0.233333	0.433333	-0.0333333	0.6		0.6	0.233333	0.266667	0.866667	0.0666667	0.266667	0.9	0.733333	-0.2
0.433333	0.1	-0.0333333	0.5	0.633333	-0.0333333	0.833333	0.333333	-0.333333		0.166667	0.166667	0.366667	0.541667	0.333333	0.466667	-0.166667	0.4	0.285714
0.266667	-0.4	0.133333	0.433333	-0.1	0.1	0.766667	0.533333	0.8		0.866667	0.566667	0.5	0.666667	0.333333	0.733333	0.7	0.866667	0.866667
0.464286	0.6	0.266667	0.517241	0.5	-0.233333	0.285714	0.4	-0.4		0.4	0.466667	0.6	0.833333	0.466667	0.333333	0.933333	0.433333	0.666667
0.266667	-0.166667	0.2	0.166667	0.0333333	0.233333	0.1	0.4	0		0.866667	0.166667	0.533333	0.733333	0.366667	0.7	0.733333	0.833333	0.766667
0.466667	0.333333	0.6	0.366667	0.4	0.233333	0.4	0	-0.333333		0.7	0.166667	0.3	0.9	0.3	0.233333	0.966667	0.1	0.5
0.133333	0.3	0.433333	0.107143	0.266667	0.5	-0.2	0.0666667	0.3		0.4	0.366667	0.333333	0.1	0.366667	0.4	0.3	0.4	0.666667
0.1	0.566667	0.333333	-0.133333	0.733333	0.333333	-0.0333333	0.966667	0.433333		0.633333	0.3	0.344828	0.566667	0.0333333	0.366667	0.633333	0.0666667	0.6
mutant vs rescue "Mann Whitney test" p-val 0.7252			mutant vs rescue "Mann Whitney test" p-val 0.3822			mutant vs rescue "Mann Whitney test" p-val 0.9289				mutant vs rescue "Mann Whitney test" p-val 0.0303 (*)			mutant vs rescue "Mann Whitney test" p-val 0.0156 (*)			mutant vs rescue "Mann Whitney test" p-val 0.7250
"brain only" vs rescue "Mann Whitney test" p-val: 0.5644			"brain only" vs rescue "Mann Whitney test" p-val: 0.1589			"brain only" vs rescue "Mann Whitney test" p-val: 0.5644				"brain only" vs rescue "Mann Whitney test" p-val: 0.0784			"brain only" vs rescue "Mann Whitney test" p-val: 0.0246 (*)			"brain only" vs rescue "Mann Whitney test" p-val: 0.6444
Fig. 4 - Suppl1 B' - Gr43a - mutant, rescue and "brain-only"
Preferrence to Fructose 100mM
2.5%										1%
rescue: Gr43a-KI; Gr43aUAS x Gr43a-KI; + 2m	mutant ctrl: Gr43a-KI x Gr43a-KI;Cha7.4kb-Gal80 2m	"brain only": Gr43a-KI; Gr43aUAS x Gr43a-KI; Cha7.4kb-Gal80 2m	rescue: Gr43a-KI; Gr43aUAS x Gr43a-KI; + 5m	mutant ctrl: Gr43a-KI x Gr43a-KI;Cha7.4kb-Gal80 5m	"brain only": Gr43a-KI; Gr43aUAS x Gr43a-KI; Cha7.4kb-Gal80 5m	rescue: Gr43a-KI; Gr43aUAS x Gr43a-KI; + 15m	mutant ctrl: Gr43a-KI x Gr43a-KI;Cha7.4kb-Gal80 15m	"brain only": Gr43a-KI; Gr43aUAS x Gr43a-KI; Cha7.4kb-Gal80 15m		rescue: Gr43a-KI; Gr43aUAS x Gr43a-KI; + 2m	mutant ctrl: Gr43a-KI x Gr43a-KI;Cha7.4kb-Gal80 2m	"brain only": Gr43a-KI; Gr43aUAS x Gr43a-KI; Cha7.4kb-Gal80 2m	rescue: Gr43a-KI; Gr43aUAS x Gr43a-KI; + 5m	mutant ctrl: Gr43a-KI x Gr43a-KI;Cha7.4kb-Gal80 5m	"brain only": Gr43a-KI; Gr43aUAS x Gr43a-KI; Cha7.4kb-Gal80 5m	rescue: Gr43a-KI; Gr43aUAS x Gr43a-KI; + 15m	mutant ctrl: Gr43a-KI x Gr43a-KI;Cha7.4kb-Gal80 15m	"brain only": Gr43a-KI; Gr43aUAS x Gr43a-KI; Cha7.4kb-Gal80 15m
0.333333	0.0666667	0.2	0.133333	0.233333	-0.2	-0.166667	-0.0333333	-0.2		0.37931	0.0666667	0.0666667	0.241379	0	0	0.533333	-0.133333	-0.166667
0.233333	-0.0333333	0.5	0.2	0.2	0.366667	0.4	0	-0.5		0.133333	0.233333	-0.266667	0	0.133333	-0.5	0.133333	-0.1	-0.5
0.466667	0.166667	-0.166667	0.4	0.333333	-0.0333333	0.333333	0.233333	0.1		-0.0666667	-0.166667	0.137931	-0.0666667	0	0.103448	0.6	-0.233333	-0.0689655
0.133333	0.133333	-0.266667	-0.366667	0.133333	0.133333	-0.0666667	0.166667	0.433333		0.1	0.133333	-0.266667	0.433333	0.166667	-0.333333	0.0333333	0	0.466667
0.0333333	-0.233333	0	-0.0666667	-0.266667	0.133333	-0.833333	-0.0333333	-0.366667		0.4	-0.166667	0.0333333	0.433333	-0.266667	0.233333	0.566667	0	0.5
0.1	-0.1	0.133333	0.3	0.0333333	-0.0333333	0.3	-0.133333	0		0.566667	-0.133333	-0.133333	0.4	0.166667	0.0333333	0.0333333	0.1	0.166667
0.6	-0.266667	0.233333	0.733333	-0.366667	-0.1	0.233333	0.0666667	-0.7		0.1	-0.3	0.166667	0.2	-0.0333333	0.0555556	0.1	-0.0333333	0.666667
-0.1	-0.133333	0.266667	0.0666667	-0.0333333	0.366667	0	-0.166667	0.333333		0.633333	0	0.233333	0.466667	0.166667	0.266667	0.266667	0.566667	0.3
0.4	-0.0333333	0.0666667	0.4	0.2	0.333333	-0.166667	-0.0333333	-0.0666667		0.3	-0.0333333	-0.0769231	0.433333	-0.0666667	0.347826	0.333333	-0.2	-0.1
0.3	-0.0333333	-0.0333333	0.233333	0.0666667	-0.166667	0.433333	-0.233333	-0.333333		-0.0333333	-0.233333	0	0.266667	-0.366667	0.166667	-0.2	0	0.566667
0.133333	-0.233333	0.24	-0.0666667	0.0666667	-0.4	0.3	0.1	-0.08		-0.0333333	0.133333	0.1	0.1	-0.333333	0.2	0.0666667	-0.0666667	0.0666667
0.233333	0.25	0.433333	0.166667	-0.266667	0.6	0.2	-0.1	0.5		0.0333333	-0.366667	-0.133333	-0.1	-0.6	0.266667	-0.1	-0.3	0.766667
0	0.0333333	0.129032	-0.266667	0.2	0.2	-0.2	0.266667	-0.0333333		0.466667	-0.366667	0.133333	0	-0.0333333	-0.0666667	0.466667	0	0.266667
-0.233333	-0.166667	0.1	-0.133333	-0.3	0.166667	-0.3	0.2	0.166667		0.333333	0.0333333	-0.1	0.466667	0	0.133333	0.3	-0.266667	-0.3
-0.0333333	-0.166667	-0.1	0.466667	-0.0333333	0	0.0333333	-0.0333333	0.8		-0.133333	0.366667	0	0.0357143	0.2	0.1	0.933333	0.1	-0.0333333
mutant vs rescue "Mann Whitney test" p-val 0.0058 (**)			mutant vs rescue "Mann Whitney test" p-val 0.2275			mutant vs rescue "Mann Whitney test" p-val 0.5730				mutant vs rescue "Mann Whitney test" p-val 0.0083 (**)			mutant vs rescue "Mann Whitney test" p-val 0.0040 (**)			mutant vs rescue "Mann Whitney test" p-val 0.0014 (**)
"brain only" vs rescue "Mann Whitney test" p-val: 0.5054			"brain only" vs rescue "Mann Whitney test" p-val: 0.5594			"brain only" vs rescue "Mann Whitney test" p-val: 0.6900				"brain only" vs rescue "Mann Whitney test" p-val: 0.0226 (*)			"brain only" vs rescue "Mann Whitney test" p-val: 0.1391			"brain only" vs rescue "Mann Whitney test" p-val: 0.5056
Preferrence to Fructose 500mM
2.5%										1%
rescue: Gr43a-KI; Gr43aUAS x Gr43a-KI; + 2m	mutant ctrl: Gr43a-KI x Gr43a-KI;Cha7.4kb-Gal80 2m	"brain only": Gr43a-KI; Gr43aUAS x Gr43a-KI; Cha7.4kb-Gal80 2m	rescue: Gr43a-KI; Gr43aUAS x Gr43a-KI; + 5m	mutant ctrl: Gr43a-KI x Gr43a-KI;Cha7.4kb-Gal80 5m	"brain only": Gr43a-KI; Gr43aUAS x Gr43a-KI; Cha7.4kb-Gal80 5m	rescue: Gr43a-KI; Gr43aUAS x Gr43a-KI; + 15m	mutant ctrl: Gr43a-KI x Gr43a-KI;Cha7.4kb-Gal80 15m	"brain only": Gr43a-KI; Gr43aUAS x Gr43a-KI; Cha7.4kb-Gal80 15m		rescue: Gr43a-KI; Gr43aUAS x Gr43a-KI; + 2m	mutant ctrl: Gr43a-KI x Gr43a-KI;Cha7.4kb-Gal80 2m	"brain only": Gr43a-KI; Gr43aUAS x Gr43a-KI; Cha7.4kb-Gal80 2m	rescue: Gr43a-KI; Gr43aUAS x Gr43a-KI; + 5m	mutant ctrl: Gr43a-KI x Gr43a-KI;Cha7.4kb-Gal80 5m	"brain only": Gr43a-KI; Gr43aUAS x Gr43a-KI; Cha7.4kb-Gal80 5m	rescue: Gr43a-KI; Gr43aUAS x Gr43a-KI; + 15m	mutant ctrl: Gr43a-KI x Gr43a-KI;Cha7.4kb-Gal80 15m	"brain only": Gr43a-KI; Gr43aUAS x Gr43a-KI; Cha7.4kb-Gal80 15m
0.3	0.233333	0.533333	0.433333	0.266667	0.366667	0.533333	0.8	0.5		0.2	-0.133333	0.3	0.533333	-0.366667	0.266667	0.8	-0.433333	0.533333
0.1	0.166667	0.1	0.1	0.133333	0	0.233333	0.233333	0.0666667		0.533333	0.133333	0.0333333	0.0666667	0.4	0.166667	0.333333	0.7	0
0.2	0.366667	0.1	0.333333	0.3	0.0666667	0.333333	0.433333	0.8		0.333333	-0.0333333	0.266667	0.0666667	0.433333	0.0666667	0.3	0.35	0.266667
0.233333	0	-0.1	0.4	0.5	0.333333	0.266667	0.833333	0.6		0.466667	-0.0666667	0.333333	0.6	0.133333	0.366667	0.633333	0.0333333	0.366667
0.233333	0.266667	0.266667	0.4	0.366667	0.366667	0.866667	0.1	0.2		0.5	0.0333333	-0.0666667	0.633333	0.1	0.466667	0.433333	0.1	0.366667
0.566667	0.366667	-0.0333333	0.466667	0.2	-0.1	0.5	0.333333	0.366667		0.466667	0.0333333	-0.133333	0.466667	0.233333	0.266667	0.533333	0.166667	-0.133333
0.133333	0.233333	0.433333	0.233333	0.6	0.3	-0.0666667	0.433333	-0.166667		0.533333	0.333333	0	0.133333	0.566667	0.166667	0.433333	0.617647
0.233333	0.1	0.1	0.233333	0.366667	0.2	0.366667	0.1	0.0666667
0.333333			0.466667				0.266667				0.566667			0.466667			0.266667
mutant vs rescue "Mann Whitney test" p-val 0.8383			mutant vs rescue "Mann Whitney test" p-val 0.8693			mutant vs rescue "Mann Whitney test" p-val 0.7951				mutant vs rescue "Mann Whitney test" p-val 0.0214 (*)			mutant vs rescue "Mann Whitney test" p-val 0.5156			mutant vs rescue "Mann Whitney test" p-val 0.0873
"brain only" vs rescue "Mann Whitney test" p-val: 0.2420			"brain only" vs rescue "Mann Whitney test" p-val: 0.0484 (*)			"brain only" vs rescue "Mann Whitney test" p-val: 0.4663				"brain only" vs rescue "Mann Whitney test" p-val: 0.0052 (**)			"brain only" vs rescue "Mann Whitney test" p-val: 0.0810			"brain only" vs rescue "Mann Whitney test" p-val: 0.6900
Fig. 4 - Suppl1 C - Gr43a - brain ko
Preferrence to Fructose 100mM
2.5%										1%
UAS-TNT/+ 2m	Gr43GAL4/+; Cha7.4kb-Gal80/+ 2m	Gr43aGAL/UAS-TNT; Cha7.4kb-Gal80/+ ko brain 2m	UAS-TNT/+ 5m	Gr43GAL4/+; Cha7.4kb-Gal80/+ 5m	Gr43aGAL/UAS-TNT; Cha7.4kb-Gal80/+ ko brain 5m	UAS-TNT/+ 15m	Gr43GAL4/+; Cha7.4kb-Gal80/+ 15m	Gr43aGAL/UAS-TNT; Cha7.4kb-Gal80/+ ko brain 15m		UAS-TNT/+ 2m	Gr43GAL4/+; Cha7.4kb-Gal80/+ 2m	Gr43aGAL/UAS-TNT; Cha7.4kb-Gal80/+ ko brain 2m	UAS-TNT/+ 5m	Gr43GAL4/+; Cha7.4kb-Gal80/+ 5m	Gr43aGAL/UAS-TNT; Cha7.4kb-Gal80/+ ko brain 5m	UAS-TNT/+ 15m	Gr43GAL4/+; Cha7.4kb-Gal80/+ 15m	Gr43aGAL/UAS-TNT; Cha7.4kb-Gal80/+ ko brain 15m
0.3	0.3	0	0.3	0.366667	-0.0666667	0.533333	0.333333	0.166667		0.466667	0.233333	0.1	0.4	0.266667	0.533333	0.733333	0.166667	0.8
0.266667	0.466667	0.433333	0.4	0.533333	0.533333	0.366667	0.566667	0.433333		0.433333	0.266667	0.133333	0.666667	0.0666667	0.4	0.8	0.333333	0.533333
0.133333	0.433333	0.366667	0.366667	0.5	0.333333	0.633333	0	0.533333		0	0.4	0.3	0.5	0.433333	0.1	0.9	0.3	0.366667
0.0666667	0.333333	0.166667	0.1	0.233333	0.2	-0.0333333	0.366667	0.733333		0.166667	0.2	0.133333	0.7	0.266667	0.233333	0.733333	0.3	0.366667
0.2	-0.233333	-0.1	0.333333	0.233333	0.166667	0.3	0.533333	0.766667		0.233333	0.4	-0.0666667	0.433333	0.333333	0.266667	0.266667	0.533333	0.733333
Anova p-val: 0.8080			Anova p-val: 0.4375			Anova p-val: 0.4769				0.433333	0.333333	0.133333	0.566667	0.7	0.1	0.8	0.6	-0.266667
										0.166667	0.433333	0.0333333	0.133333	0.333333	0.133333	0.5	0.433333	0.0666667
										Anova p-val: 0.0185 (*)			Anova p-val: 0.0822			Anova p-val: 0.0753
Preferrence to Fructose 500mM
2.5%										1%
UAS-TNT/+ 2m	Gr43GAL4/+; Cha7.4kb-Gal80/+ 2m	Gr43aGAL/UAS-TNT; Cha7.4kb-Gal80/+ ko brain 2m	UAS-TNT/+ 5m	Gr43GAL4/+; Cha7.4kb-Gal80/+ 5m	Gr43aGAL/UAS-TNT; Cha7.4kb-Gal80/+ ko brain 5m	UAS-TNT/+ 15m	Gr43GAL4/+; Cha7.4kb-Gal80/+ 15m	Gr43aGAL/UAS-TNT; Cha7.4kb-Gal80/+ ko brain 15m		UAS-TNT/+ 2m	Gr43GAL4/+; Cha7.4kb-Gal80/+ 2m	Gr43aGAL/UAS-TNT; Cha7.4kb-Gal80/+ ko brain 2m	UAS-TNT/+ 5m	Gr43GAL4/+; Cha7.4kb-Gal80/+ 5m	Gr43aGAL/UAS-TNT; Cha7.4kb-Gal80/+ ko brain 5m	UAS-TNT/+ 15m	Gr43GAL4/+; Cha7.4kb-Gal80/+ 15m	Gr43aGAL/UAS-TNT; Cha7.4kb-Gal80/+ ko brain 15m
0.433333	0.4	0.333333	0.533333	0.7	0.533333	0.366667	0.733333	0.733333		0.366667	0.433333	0	0.666667	0.566667	-0.0666667	0.766667	0.633333	0.166667
0.1	0.533333	0.4	0.4	0.666667	0.566667	0.7	0.633333	0.433333		0.1	0.466667	0.433333	0.266667	0.3	0.533333	0.633333	0.466667	0.433333
0.133333	0.3	0.233333	0.2	0.233333	0.4	0.733333	0.566667	0.5		0.733333	0.433333	0.366667	0.633333	0.466667	0.333333	0.733333	0.533333	0.533333
0.333333	0.366667	0.166667	0.533333	0.4	0.233333	0.766667	0.533333	0.133333		0.133333	0.2	0.166667	0.666667	0.2	0.2	0.866667	0.366667	0.733333
0.333333	0.433333	0.3	0.433333	0.433333	0.4	0.933333	0.5	0.6		0.133333	0.433333	-0.1	0.633333	0.5	0.166667	0.8	0.533333	0.766667
Anova p-val: 0.1346			Anova p-val: 0.7661			Anova p-val: 0.2095				0.366667	0.6	-0.233333	0.366667	0.833333	0.233333	0.633333	1	0.0333333
										0.666667	0.1	0.2	0.466667	0.166667	0.4	0.666667	0.5	0.4
										Anova p-val: 0.0855			Anova p-val: 0.0563			Anova p-val: 0.0484 (*)
