# Supplementary material for: Taste sensing and sugar detection mechanisms in Drosophila larval primary taste center
Source: eLife journal article supplement (doi:10.7554/elife.67844), 2021-12-03
Supplement: supp [file elife-67844-supp-v1.zip › elife_poa_e67844_Figure_4_figure_supplement_2_source_data_1.xlsx]

## Sheet: Sheet1
Fig. 4 - Suppl2 - C2 x GCaMP6m
Response to Sucrose 500mM, Fructose 100mM, Fructose 500mM
w	Sucr500	Fru100	Fru500
0.181769	0.621218	1.27073	0.131146
0.20901	0.443645	0.11634	0.156359
0.0871808	0.409608	2.89491	0.690271
0.333316	0.29584	0.170985	0.108607
	0.686103	1.6368	0.0622602
		0.153247	0.213985
w vs Sucrose 500mM "Mann Whitney test" p-val: 0.0317 (*)
w vs Fructose 100mM "Mann Whitney test" p-val: 0.6095
w vs Fructose 100mM "Mann Whitney test" p-val: 0.7619
