# Supplementary material for: Taste sensing and sugar detection mechanisms in Drosophila larval primary taste center
Source: eLife journal article supplement (doi:10.7554/elife.67844), 2021-12-03
Supplement: supp [file elife-67844-supp-v1.zip › elife_poa_e67844_Figure_4_source_data_1.xlsx]

## Sheet: behavior - fig4
Source data behavior Fig.4
2-choice assay on 25 cm petri dishes
L3 larvae, 4 day old, normally fed
Fig 4A
Preferrence to Sucrose 500mM, 2.5%
5minute preferrence
UAS-TNTE/+ c2		C2-Gal4/+ 5m	C2-Gal4 > UAS-TNTE 5m		C6-Gal4/+	C6-Gal4 > UAS-TNTE		C7-Gal4/+	C7-Gal4 > UAS-TNTE
0.533333		0.333333	-0.2		0.633333	0.266667		0.433333	0.866667
0.5		0.566667	0.0333333		0.166667	0.3		0.366667	0.304348
0.666667		0.533333	0.166667		0	0.0869565		0.233333	0.45
0.0714286		0.333333	0.166667		0.176471	0.25		0.4	0.3
0.566667		0.37931	0.137931		0.583333	-0.0666667		0.2	0.266667
0.5		0.1	0.233333		0.6	0.3		0.2	0.166667
0.25		0.433333	0.0333333		0.1	0.4		-0.2	0.433333
0.0714286		0.266667	0.566667		0.1	0.6		0.633333	0.5
0.5		0.233333	0		0.533333	0.566667		0.8	0.666667
0.2		0.142857	0		0.4	0.5		0.766667	0.533333
Anova p-val
C2 genotypes: 0.0380 (*)
C6 genotypes: 0.7168
C7 genotypes: 0.4907
Fig4B
C2 neuron - Preferrence to Sucrose 100mM
2.5%										1%
UAS-TNTE/+ 2m	C2-Gal4/+ 2m	C2-Gal4 > UAS-TNTE 2m	UAS-TNTE/+ 5m	C2-Gal4/+ 5m	C2-Gal4 > UAS-TNTE 5m	UAS-TNTE/+ 15m	C2-Gal4/+ 15m	C2-Gal4 > UAS-TNTE 15m		UAS-TNTE/+ 2m	C2-Gal4/+ 2m	C2-Gal4 > UAS-TNTE 2m	UAS-TNTE/+ 5m	C2-Gal4/+ 5m	C2-Gal4 > UAS-TNTE 5m	UAS-TNTE/+ 15m	C2-Gal4/+ 15m	C2-Gal4 > UAS-TNTE 15m
0.433333	0.433333	-0.0666667	0.433333	0.366667	0.1	0.3	0.466667	0.133333		0.0666667	0.433333	0.5	0.206897	0.8	0.136364	0.5	0.6	0.409091
0.1	0.333333	-0.233333	0.133333	0.333333	-0.133333	0.133333	0.666667	0.133333		0.206897	0.766667	0.0666667	0.233333	0.7	0.533333	-0.0666667	0.766667	0.833333
0.344828	0.0666667	0.133333	0.2	0.0333333	-0.233333	0.166667	0.333333	0.3		0.2	0.266667	0.133333	0.633333	0.333333	0.266667	0.266667	0.206897	0.466667
0.133333	0.241379	0.241379	-0.0344828	0.466667	0.413793	0.310345	0.333333	0.724138		0.666667	0.0666667	0.6	0.666667	0.7	0.1	0.366667	0.8	0.35
0.1	-0.166667	0	0.266667	0.1	-0.133333	0.666667	0.3	-0.1		0.7	-0.366667	-0.1	0.966667	0	0	0.933333	0.366667	0.2
0.266667	0.266667	-0.233333	0.5	0.233333	-0.233333	0.766667	0	0		-0.2	0.416667	-0.0333333	0.3	0.416667	-0.0666667	0.766667	0.583333	0.766667
0.266667	-0.1	0.0666667	-0.0333333	0.0333333	0.266667	0.766667	0.466667	0.1		0.0666667	0.233333	0.206897	0.6	0.3	0.2	0.766667	0.866667	0.3
0.566667	0	0.0333333	0.733333	0.433333	0.166667	0.866667	0.533333	0.5		0.6	-0.0666667	-0.0666667	0.433333	0.333333	0.166667	0.933333	0.733333	0.3
0.466667	0.433333	0.2	0.466667	0.833333	0.233333	0.5	0.733333	0.133333		0.6	0.5	0.0666667	0.766667	0	0.366667	0.766667	0.25	0.533333
0.566667	0.233333	0.3	0.6	0.766667	0.3	0.666667	0.666667	-0.0666667		0.133333	0	0.3	0.2	0.166667	0.333333	0.6	0.233333	0.4
Anova p-val: 0.0117 (*)			Anova p-val: 0.0418 (*)			Anova p-val: 0.0157 (*)				Anova p-val: 0.5879			Anova p-val: 0.0399 (*)			Anova p-val: 0.5548
C2 neuron - Preferrence to Sucrose 500mM
2.5%										1%
UAS-TNTE/+ 2m	C2-Gal4/+ 2m	C2-Gal4 > UAS-TNTE 2m	UAS-TNTE/+ 5m	C2-Gal4/+ 5m	C2-Gal4 > UAS-TNTE 5m	UAS-TNTE/+ 15m	C2-Gal4/+ 15m	C2-Gal4 > UAS-TNTE 15m		UAS-TNTE/+ 2m	C2-Gal4/+ 2m	C2-Gal4 > UAS-TNTE 2m	UAS-TNTE/+ 5m	C2-Gal4/+ 5m	C2-Gal4 > UAS-TNTE 5m	UAS-TNTE/+ 15m	C2-Gal4/+ 15m	C2-Gal4 > UAS-TNTE 15m
0.7	0.3	-0.272727	0.7	0.233333	0.0909091	1	0.166667	0.863636		0.533333	0.366667	0.6	0.666667	0.8	0.466667	0.833333	0.7	0.333333
0.433333	0.466667	0.133333	0.6	0.433333	0.266667	0.6	0.466667	-0.0666667		0.466667	0.72	0.25	0.8	0.8	0.5	0.9	0.84	0.4
0.2	0.5	0.266667	0.233333	0.5	0.533333	0.633333	0.766667	-0.2		0.842105	0.733333	0.6	0.631579	0.9	0.666667	0.894737	0.9	0.166667
0.266667	0.5	0.466667	0.466667	0.7	0.0333333	0.71875	0.933333	-0.166667		0.666667	0.633333	0.545455	0.8	0.733333	0.454545	0.566667	0.533333	0.818182
0.333333	0.2	-0.133333	0.0333333	0.166667	-0.433333	0.333333	0.633333	-0.0666667		0.3	0.0333333	0.266667	0.533333	0	0.166667	0.766667	0.1	0.1
0.454545	0.4	0.4	0.454545	0.633333	0.333333	-0.227273	0.466667	-0.166667		0.5	0.0666667	0.3	0.6	0.3	0.0666667	0.533333	-0.166667	0.566667
0.566667	0.466667	-0.0333333	0.5	0.448276	0.233333	0.4	-0.266667	0.366667		0.333333	0.4	0.433333	0.433333	0.3	0.566667	0.866667	0.566667	0.5
0.333333	0.5	0.3	0.142857	0.266667	0.266667	0.166667	0.392857	0.733333		Anova p-val: 0.6505			Anova p-val: 0.2548			Anova p-val: 0.0744
0.533333	0.6	-0.133333	0.566667	0.533333	0.1	0.666667	0.333333	0.5
0.5	0.5	0.366667	0.566667	0.266667	0.366667	0.833333	0.2	-0.133333
Anova p-val: 0.0012 (**)			Anova p-val: 0.0298 (*)			Anova p-val: 0.1465
C2 neuron - Preferrence to Sucrose 1M
2.5%										1%
UAS-TNTE/+ 2m	C2-Gal4/+ 2m	C2-Gal4 > UAS-TNTE 2m	UAS-TNTE/+ 5m	C2-Gal4/+ 5m	C2-Gal4 > UAS-TNTE 5m	UAS-TNTE/+ 15m	C2-Gal4/+ 15m	C2-Gal4 > UAS-TNTE 15m		UAS-TNTE/+ 2m	C2-Gal4/+ 2m	C2-Gal4 > UAS-TNTE 2m	UAS-TNTE/+ 5m	C2-Gal4/+ 5m	C2-Gal4 > UAS-TNTE 5m	UAS-TNTE/+ 15m	C2-Gal4/+ 15m	C2-Gal4 > UAS-TNTE 15m
0.2	0.0333333	0.0666667	0.266667	0.533333	-0.1	0.766667	0.466667	0.133333		0.7	0.333333	0.5	0.833333	0.8	0.533333	0.833333	0.7	0.2
0.566667	0.6	0.1	0.666667	0.666667	-0.1	0.533333	0.433333	0.1		-0.5	0.533333	0.1	-0.233333	0.666667	0.233333	0.333333	0.7	0.166667
0.733333	0.233333	0.0333333	0.433333	0.433333	0.0333333	0.866667	0.3	0.0333333		0.366667	0.4	0.166667	0.566667	0.6	0.433333	0.766667	0.766667	0.833333
0.6	0.533333	0.533333	0.833333	0.5	0.533333	0.5	0.233333	0.533333		0.7	0.7	0.4	0.933333	0.7	0.333333	0.933333	0.5	0.4
0.566667	0.366667	0.1	0.633333	0.633333	0.3	0.766667	0.766667	0.866667		0.0277778	0.633333	0.533333	0.7	0.633333	0.5	0.666667	0.533333	0.2
0.466667	0.366667	0.166667	0.8	0.533333	0.466667	0.833333	0.4	0.0666667		0.433333	0.533333	0	0.633333	0.666667	0.133333	0.533333	0.266667	0.4
0.3	0.366667	-0.133333	0.5	0.466667	-0.133333	0.7	0.6	0.733333		0.433333	0.3	0.333333	0.8	0.6	0.866667	0.9	0.866667	0.7
0.5	0.266667	0.266667	0.566667	0.7	0.2	0.6	0.766667	0.333333		0.433333	0.133333	0.533333	0.466667	0.133333	0.866667	0.566667	0.366667	0.4
0.166667	0.2	0.1	0.2	0.5	-0.0333333	0.7	0.733333	0.2		0.266667	0.366667	0.166667	0.733333	0.8	0.466667	0.733333	0.7	0.533333
0.533333	0.366667	-0.533333	0.366667	0.3	-0.366667	0.6	0.766667	0.133333		0.2	0.5		0.633333	0.366667		0.666667	0.466667
Anova p-val: 0.0010 (**)			Anova p-val: <0.0001 (***)			Anova p-val: 0.0029 (**)				Anova p-val: 0.6505			Anova p-val: 0.2548			Anova p-val: 0.0744
Fig4D
C2 neuron - Optogenetics, Preferrence to Sucrose 500mM
2.5%
light activated
UAS-GtACR1/+ 2m	C2-Gal4/+ 2m	C2-Gal4 > UAS-GtACR1 2m	UAS-GtACR1/+ 5m	C2-Gal4/+ 5m	C2-Gal4 > UAS-GtACR1 5m	UAS-GtACR1/+ 15m	C2-Gal4/+ 15m	C2-Gal4 > UAS-GtACR1 15m
0.566667	0.5	0.133333	0.533333	0.766667	0.166667	0.633333	0.966667	0.2
0.466667	0.1	0.133333	0.533333	0.633333	-0.1	0.7	0.366667	-0.266667
0.433333	0.433333	0.233333	0.4	0.533333	0.733333	0.6	0.9	0.4
0.6	0.533333	0.233333	0.533333	0.633333	-0.2	0.8	0.633333	-0.166667
0.2	0.3	0.1	0.6	0.566667	0.0333333	0.866667	0.7	0.6
0.766667	0.266667	0.5	0.733333	0.566667	0.1	0.866667	0.166667	0.1
0.6	0.533333	0.333333	0.633333	0.633333	0.566667	0.8	0.766667	0.466667
0.133333	0.266667	0.1	0.2	0.233333	0.1	0.533333	0.533333	-0.2
Anova p-val: 0.0288 (*)			Anova p-val: 0.0038 (**)			Anova p-val: 0.0004 (***)
no light activation, dark control
UAS-GtACR1/+ 2m	C2-Gal4/+ 2m	C2-Gal4 > UAS-GtACR1 2m	UAS-GtACR1/+ 5m	C2-Gal4/+ 5m	C2-Gal4 > UAS-GtACR1 5m	UAS-GtACR1/+ 15m	C2-Gal4/+ 15m	C2-Gal4 > UAS-GtACR1 15m
0.2	-0.0344828	0.266667	0.633333	0.6	0.133333	0.933333	0.366667	0.166667
0.1	0.433333	0.3	-0.1	0.4	0.233333	0.0666667	0.733333	0.133333
0.266667	0.466667	0.533333	0.133333	0.5	0.766667	0.4	0.766667	0.8
0.266667	0.433333	0.4	0.433333	0.533333	0.533333	0.766667	0.5	0.8
0.533333	0.466667	0.433333	0.5	0.448276	0.633333	0.6	-0.266667	0.6
0.433333	0.5	0.0666667	0.466667	0.266667	0.533333	0.633333	0.392857	0.333333
0.233333	0.6	-0.166667	0.166667	0.533333	0.466667	0.0666667	0.333333	0.5
Anova p-val: 0.3652			Anova p-val: 0.3090			Anova p-val: 0.8535
