# Supplementary figures and images for: Taste sensing and sugar detection mechanisms in Drosophila larval primary taste center
Source: eLife journal article supplement (doi:10.7554/elife.67844), 2021-12-03

**Figure 1 - Figure Supplement 1: Whole-organ calcium imaging - data processing.**

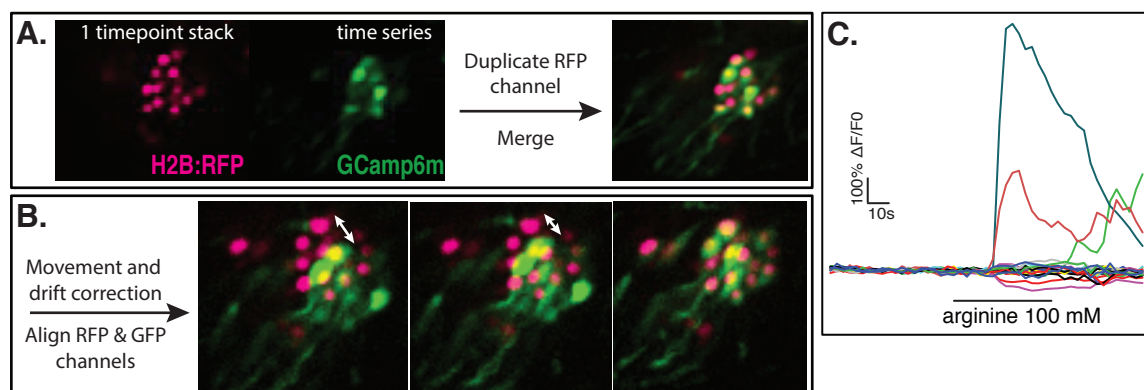

Supplement: supp [file elife-67844-supp-v1.zip › elife_poa_e67844_Figure_1_figure_supplement_1.pdf]

# Single neuron sugar responses based on order

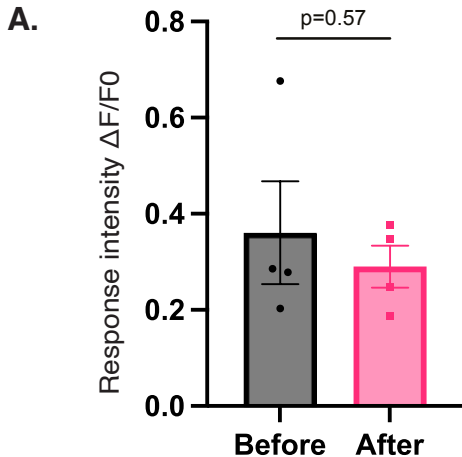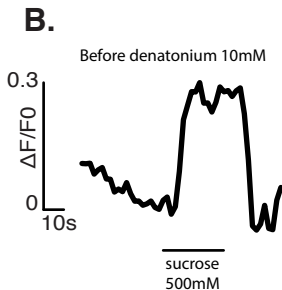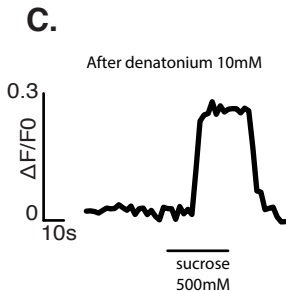

Supplement: supp [file elife-67844-supp-v1.zip › elife_poa_e67844_Figure_2_figure_supplement_2.pdf]

**Figure 4 - Supplement1: Mechanism of larval sugar taste at the periphery.**

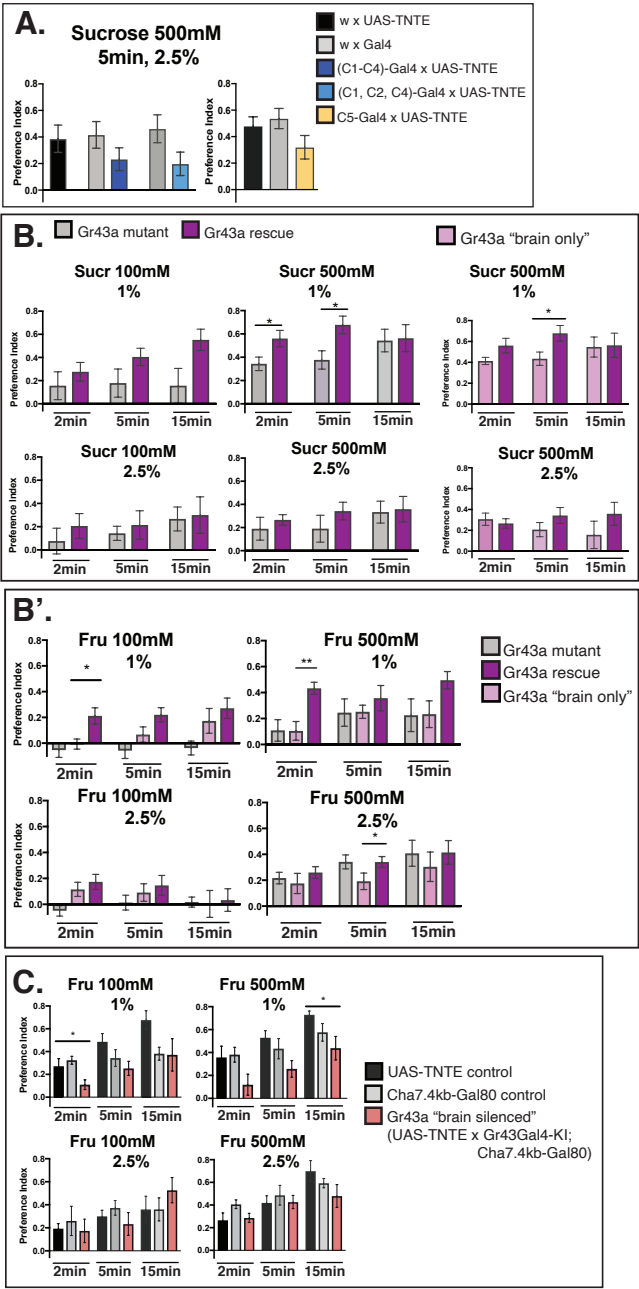

Supplement: supp [file elife-67844-supp-v1.zip › elife_poa_e67844_Figure_4_figure_supplement_1.pdf]

**Figure 4 - Supplement 2: calcium imaging responses to sucrose/fructose in C2.**

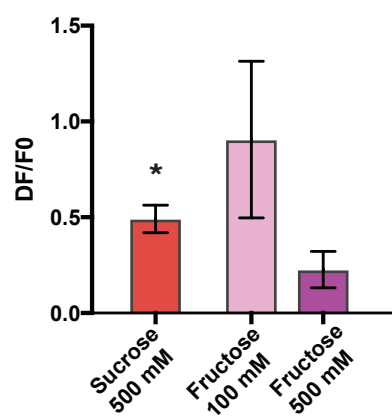

Supplement: supp [file elife-67844-supp-v1.zip › elife_poa_e67844_Figure_4_figure_supplement_2.pdf]
